# Supplementary material for: Liquid electrolyte chemistries for solid electrolyte interphase construction on silicon and lithium-metal anodes
Source: Royal Society of Chemistry journal article supplement (doi:10.1039/d3sc03514j), 2023-01-01
Supplement: d3sc03514j1.pdf [file d3sc03514j1.pdf]

## Electronic Supplementary Information

### Liquid electrolyte chemistries for solid electrolyte interphase construction on silicon and lithium-metal anodes

Sewon Park,<sup>†a</sup> Saehun Kim,<sup>†a</sup> Jeong-A Lee,<sup>a</sup> Makoto Ue<sup>b</sup> and Nam-Soon Choi<sup>\*a</sup>

<sup>a</sup>Department of Chemical and Biomolecular Engineering, Korea Advanced Institute of Science and Technology (KAIST), 291 Daehak-ro, Yuseong-gu, Daejeon 34141, Republic of Korea

<sup>b</sup>Research Organization for Nano & Life Innovation, Waseda University, 513 Waseda-tsurumaki-cho, Shinjuku-ku, Tokyo 162-0041, Japan

<sup>†</sup>These authors contributed equally to this work

<sup>\*</sup>Corresponding author. Email: nschoi@kaist.ac.kr

**Table S1.** Commercialized SEI forming electrolyte additives for lithium-ion batteries

| Additive compound                                                                                                             | Patent                   | Company                | Priority |
|-------------------------------------------------------------------------------------------------------------------------------|--------------------------|------------------------|----------|
| 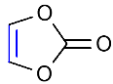<br>Vinylene carbonate<br>(VC)               | FR2719161B1 <sup>1</sup> | SAFT                   | 1994     |
| <br>Vinylethylene carbonate<br>(VEC)         | JP4489207B2 <sup>2</sup> | Mitsui Chemicals       | 1998     |
| <br>Fluoroethylene carbonate<br>(FEC)        | US6506524B1 <sup>3</sup> | NRCC                   | 1996     |
| <br>Ethylene sulfite<br>(ES)                | JP3546566B2 <sup>4</sup> | Sony                   | 1995     |
| <br>Ethylene sulfate<br>(DTD)              | JP3760540B2 <sup>5</sup> | Mitsubishi<br>Chemical | 1996     |
| <br>1,3-Propane sultone<br>(PS)            | JP3978881B2 <sup>6</sup> | Ube Industries         | 1997     |
| <br>1,3-Propene 1,3-sultone<br>(PES)       | JP4190162B2 <sup>7</sup> | Mitsui Chemicals       | 2001     |
| <br>Methylene methanedisulfonate<br>(MMDS) | JP4033074B2 <sup>8</sup> | NEC                    | 2002     |

|                                                                                                                                                |                            |                    |      |
|------------------------------------------------------------------------------------------------------------------------------------------------|----------------------------|--------------------|------|
| 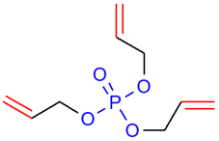 <p>Triallyl phosphate<br/>(TALP)</p>                         | US6919141B2 <sup>9</sup>   | Wilson Greatbatch  | 2003 |
|  <p>Tripropargyl phosphate<br/>(TPGP)</p>                     | US6919141B2 <sup>9</sup>   | Wilson Greatbatch  | 2003 |
|  <p>Lithium bis(fluorosulfonyl)imide<br/>(LiFSI)</p>          | EP0699349B1 <sup>10</sup>  | CNRS, Hydro-Québec | 1994 |
|  <p>Lithium difluorophosphate<br/>(LiDFP)</p>                | JP3439085B2 <sup>11</sup>  | Sanyo Electric     | 1997 |
|  <p>Lithium bis(oxalato) borate<br/>(LiBOB)</p>             | DE19829030C1 <sup>12</sup> | Chemetall          | 1998 |
|  <p>Lithium difluoro(oxalato)borate<br/>(LiFOB)</p>         | JP3722685B2 <sup>13</sup>  | Central Glass      | 2000 |
|  <p>Lithium difluorobis(oxalato)phosphate<br/>(LiDFBOP)</p> | JP3722685B2 <sup>13</sup>  | Central Glass      | 2000 |

**Table S2.** Properties of electrolyte additives used in lithium batteries containing silicon and lithium metal as anodes

| Name              | Chemical structure                                                                  | Density (g mL <sup>-1</sup> ) | Molecular weight (g mol <sup>-1</sup> ) | Melting point (°C) | Boiling point (°C) |
|-------------------|-------------------------------------------------------------------------------------|-------------------------------|-----------------------------------------|--------------------|--------------------|
| FEC               | 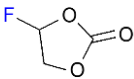   | 1.50                          | 106.05                                  | 18–23              | 210–212            |
| VC                |    | 1.35                          | 86.05                                   | 19–22              | 162                |
| LiDFP             |    | N/A                           | 107.91                                  | >300               | decomposes         |
| LiBOB             |    | N/A                           | 193.79                                  | >300               | decomposes         |
| LiFOB             |  | N/A                           | 143.77                                  | 265–271            | decomposes         |
| LiDFBOP           |  | N/A                           | 251.95                                  | 255                | decomposes         |
| LiNO <sub>3</sub> |  | 2.38                          | 68.95                                   | 255                | decomposes         |
| LiFSI             |  | 1.05                          | 187.06                                  | 126                | decomposes         |

**Table S3.** Properties of nonfluorinated and fluorinated solvents used in lithium batteries containing silicon and lithium metal as anodes

|                         | Name        | Chemical structure                                                                  | Density (g mL <sup>-1</sup> ) | Molecular weight (g mol <sup>-1</sup> ) | Boiling point (°C) |
|-------------------------|-------------|-------------------------------------------------------------------------------------|-------------------------------|-----------------------------------------|--------------------|
| Nonfluorinated solvents | EC          | 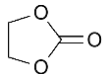   | 1.321                         | 88.06                                   | 243–244            |
|                         | PC          |    | 1.204                         | 102.09                                  | 240–242            |
|                         | DMC         |    | 1.069                         | 90.08                                   | 90                 |
|                         | DEC         |    | 0.975                         | 118.13                                  | 126–128            |
|                         | DME         |    | 0.867                         | 90.12                                   | 84–85              |
|                         | DOL         |   | 1.07                          | 74.08                                   | 74–76              |
| Fluorinated solvents    | FEC         |  | 1.50                          | 106.05                                  | 210–212            |
|                         | DFEC        |  | 1.52                          | 124.04                                  | 233.8              |
|                         | BTFE        |  | 1.404                         | 180.06                                  | 62–64              |
|                         | TTE         |  | 1.54                          | 232.07                                  | 92                 |
|                         | TFOFE (OTE) |  | 1.66                          | 332.09                                  | 133                |
|                         | TFEO        |  | 1.457                         | 310.12                                  | 144–146            |
|                         | MTFP        |  | 1.29                          | 142.08                                  | 96                 |
|                         | DMTMSA      |  | 1.443                         | 177.16                                  | 116.9              |
|                         | FDMB        |  | 1.21                          | 190.14                                  | 154                |

|        |                                                                                    |       |        |     |
|--------|------------------------------------------------------------------------------------|-------|--------|-----|
| TFEMC  | 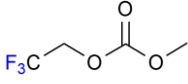  | 1.34  | 158.08 | 90  |
| TFEP   |   | 1.52  | 206.06 | 160 |
| TFETFE |   | 1.49  | 200.06 | 56  |
| mFT    |   | 0.991 | 110.13 | 115 |
| BFE    |   | 0.98  | 110.10 | 128 |
| DFDEC  |   | 1.51  | 226.07 | 118 |
| TFE    |   | 1.464 | 196.05 | 55  |
| HFPM   |  | 1.38  | 182.07 | 50  |

**Section S1.** On lithium dendrite suppression ability<sup>14</sup>

During lithium plating, lithium dendrites need to penetrate the passivation layer along grain boundaries. Based on Griffith's energy-based analysis, interfacial energy ( $E_{\text{interface}}$ ) increases because of the construction of a new interface at Li/SEI, while strain energy ( $E_{\text{strain}}$ ) is released upon the growth of lithium dendrites. Therefore, the total energy ( $E_{\text{total}}$ ) for lithium dendrite growth (Eq. S1) can be expressed as the sum of  $E_{\text{interface}}$  and  $E_{\text{strain}}$ :

$$E_{\text{total}} = E_{\text{interface}} + E_{\text{strain}}. \quad (\text{S1})$$

$E_{\text{interface}}$  can be expressed as follows:

$$E_{\text{interface}} = 2\gamma LB, \quad (\text{S2})$$

where  $\gamma$  is the interfacial energy required to create a new Li/SEI interface per unit area,  $L$  is the interface length, and  $B$  is the interface thickness.

$E_{\text{strain}}$  can be expressed as follows:

$$E_{\text{strain}} = \frac{\sigma^2}{2E}V - \frac{\sigma^2}{2E}B\pi L^2, \quad (\text{S3})$$

where  $\sigma$  is the stress at the tip of the crack or grain boundary,  $E$  is the bulk modulus, and  $V$  is the volume.

Therefore, Eq. S1 can be rewritten as

$$E_{\text{total}} = 2\gamma LB + \frac{\sigma^2}{2E}V - \frac{\sigma^2}{2E}B\pi L^2. \quad (\text{S4})$$

$E_{\text{total}}$  increases with the increasing length of lithium dendrites, reaching a maximum at a critical dendrite length ( $L_c$ ) and subsequently decreasing. Therefore,  $L_c$  is the value at which the derivative of  $E_{\text{total}}$  with respect to  $L$  becomes zero:

$$\frac{dE_{total}}{dL} = 2\gamma B - \frac{\sigma^2}{E} B\pi L = 0. \quad (S5)$$

The above equation implies

$$L_c = \frac{2\gamma E}{\pi\sigma^2}. \quad (S6)$$

The lithium dendrite suppression abilities listed in Table 1 are expressed as the products of  $\gamma$  and  $E$  and are therefore positively correlated with  $L_c$ , which indicates a delay of lithium dendrite growth according to SEI properties.

### Supplementary references

1. B. Simon and J.-P. Boeuvé, Societe des Accumulateurs Fixes et de Traction SA, FR Pat., FR2719161B1, 1994.
2. M. Toriida, H. Tan, S. Mita, T. Ishida and T. Ishitoku, Mitsui Chemicals Inc., JP Pat., JP4489207B2, 1998.
3. R. S. McMillan, D. J. Worsfold, J. J. Murray, I. Davidson and Z. X. Shu, National Research Council of Canada, US Pat., US6506524B1, 1996.
4. Y. Naruse, S. Fujita and T. Komaru, Sony Corp., JP Pat., JP3546566B2, 1995.
5. K. Shima, S. Yasukawa and S. Mori, Mitsubishi Chemical Corp., JP Pat., JP3760540B2, 1996.
6. S. Hamamoto, A. Hidaka, Y. Nakada and K. Abe, Ube Corp., JP Pat., JP2000003724A, 1997.
7. A. Hibara, T. Ishida, C. Hirano and T. Hayashi, Mitsui Chemicals Inc., JP Pat., JP4190162B2, 2001.
8. K. Utsuki, T. Kusachi and I. Yamazaki, NEC Corp., JP Pat., JP4033074B2, 2002.



9. H. Gan, E. S. Takeuchi and R. Rubino, Wilson Greatbatch Technologies Inc., US6919141B2, 2003.
10. C. Michot, M. Armand, J.-Y. Sanchez, Y. Choquette and M. Gauthier, Hydro Québec and Centre National de la Recherche Scientifique, EP Pat., EP0699349B1, 1994.
11. R. Oshita, M. Fujimoto, T. Noma and K. Nishio, *Sanyo Electric Co. Ltd.*, JP Pat., JP3439085B2, Priority: 1997.
12. U. Lischka, U. Wietelmann and M. Wegner, Chemetall GmbH, DE Pat., DE19829030C1, 1998.
13. S. Tsujioka, H. Takase, M. Takahashi, H. Sugimoto and M. Koide, Central Glass Co Ltd., JP Pat., JP3722685B2, 2000.
14. X. Fan, X. Ji, F. Han, J. Yue, J. Chen, L. Chen, T. Deng, J. Jiang and C. Wang, *Sci. Adv.*, 2018, **4**, eaau9245.
